# Supplementary material
Source: PubMed Central journal article supplement (PMC6301984)
Supplement: mmc2.pdf [file mmc2.pdf]

# Characterizing Inner Pressure and Stiffness of Trophoblast and Inner Cell Mass of Blastocysts

Xian Wang,<sup>1,2</sup> Zhuoran Zhang,<sup>1</sup> Hirotaka Tao,<sup>3</sup> Jun Liu,<sup>1</sup> Sevan Hopyan,<sup>3,4,5,\*</sup> and Yu Sun<sup>1,2,6,\*</sup>

<sup>1</sup>Department of Mechanical and Industrial Engineering, University of Toronto, Toronto, Ontario, Canada; <sup>2</sup>Institute of Biomaterials and Biomedical Engineering, University of Toronto, Toronto, Ontario, Canada; <sup>3</sup>Program in Developmental and Stem Cell Biology, The Hospital for Sick Children, Toronto, Ontario, Canada; <sup>4</sup>Division of Orthopaedics, The Hospital for Sick Children, Toronto, Ontario, Canada; <sup>5</sup>Department of Molecular Genetics and Surgery, University of Toronto, Toronto, Ontario, Canada; and <sup>6</sup>Department of Electrical and Computer Engineering, University of Toronto, Toronto, Ontario, Canada

**ABSTRACT** It has long been recognized that mechanical forces underlie mammalian embryonic shape changes. Before gastrulation, the blastocyst embryo undergoes significant shape changes, namely, the blastocyst cavity emerges and expands, and the inner cell mass (ICM) forms and changes in shape. The embryo's inner pressure has been hypothesized to be the driving mechanical input that causes the expansion of the blastocyst cavity and the shape changes of the ICM. However, how the inner pressure and the mechanics of the trophoblast and the ICM change during development is unknown because of the lack of a suitable tool for quantitative characterization. This work presents a laser-assisted magnetic tweezer technique for measuring the inner pressure and Young's modulus of the trophoblast and ICM of the blastocyst-stage mouse embryo. The results quantitatively showed that the inner pressure and Young's modulus of the trophoblast and ICM all increase during progression of mouse blastocysts, providing useful data for understanding how mechanical factors are physiologically integrated with other cues to direct embryo development.

## INTRODUCTION

Embryonic shape and structures in morphogenesis rely on biochemical and biophysical coordination of cell behaviors during development (1). Recent advances in cell signaling have cast light on cell sorting and patterning for forming different structures in mammalian embryos, yet mechanical properties in different structures and regions of embryos remain poorly understood (2,3).

Mechanical forces are known to play a major role in regulating cell fate in the preimplantation mammalian embryo (4–7). The first lineage specification occurs when some cells move to the inner aspect of the 16-cell morula to define the inner cell mass (ICM—embryo proper) that undergoes compaction and the trophoblast (extraembryonic) (4,6,8,9). As cells secrete fluid, small pockets of intracellular liquid coalesce to form a blastocyst cavity that displaces the ICM eccentrically. The second lineage specification occurs in the blastula when ICM cells segregate to define the epiblast and the primitive endoderm at the margin of the cavity (Fig. 1) (10). Given the temporal correlation between cell-

lineage specification and the physical shape changes of the cavity and ICM, together with the reported mechanoresponsive nature of primitive endodermal cells that separate the blastocyst cavity from the ICM (11), it is possible that the inner pressure of the blastocyst cavity mechanically drives the enlargement of the cavity and the corresponding shape changes of the ICM, thereby influencing cell rearrangements that segregate cell lineages (12,13).

To date, little is known about the inner pressure of the blastocyst cavity or mechanical properties of the trophoblast and ICM because of the lack of suitable tools for quantitative characterization. The zona pellucida (ZP) of the embryo forms a barrier for the measurement of the intraembryonic pressure and the ICM mechanics (14). For instance, the cantilevers used in atomic force microscopy (AFM) and the blunt micropipette tips used in micropipette aspiration cannot reach the inside of the embryo for measuring intraembryonic parameters without disturbing the inner pressure (15,16).

This work presents a laser-assisted magnetic tweezer technique for measuring the inner pressure and the Young's modulus of different regions of the blastocyst. Shown in Fig. 2 *a*, the system consists of a multipole magnetic tweezer device, a micromanipulator (MX7600; Siskiyou, Grants

Submitted August 10, 2018, and accepted for publication November 5, 2018.

\*Correspondence: [sevan.hopyan@sickkids.ca](mailto:sevan.hopyan@sickkids.ca) or [sun@mie.utoronto.ca](mailto:sun@mie.utoronto.ca)

Editor: Philip LeDuc.

<https://doi.org/10.1016/j.bpj.2018.11.008>

© 2018 Biophysical Society.

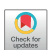

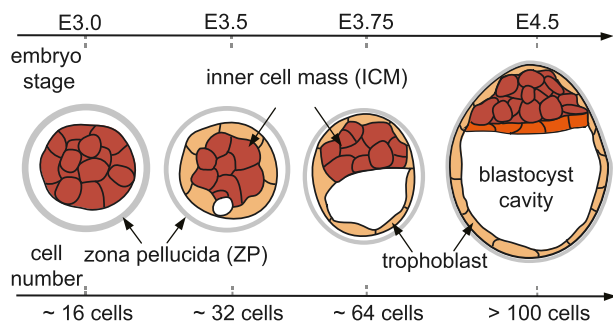

FIGURE 1 Preimplantation development of the mammalian embryo. The blastocyst consists of a cavity, inner cell mass (ICM), and trophoblast, with the zona pellucida (ZP) encapsulating the embryo. As the cavity expands, the ICM undergoes significant shape changes. Primitive endoderm (orange) arises from the ICM along the margin of the cavity. E represents embryonic days since conception. To see this figure in color, go online.

Pass, OR), and a biopsy laser (LYKOS Laser, 1460 nm wavelength and 300 mW power; Hamilton Throne, Beverly, MA), which are all installed on a standard inverted microscope (Nikon Ti-S; Nikon, Tokyo, Japan). During experiments, the micromanipulator controls micropipette positioning for magnetic bead deposition, the multipole magnetic tweezer device controls the exertion of indentation forces for mechanical measurement, and the laser ablates the ZP for bead attachment and ablates trophoblast cells for releasing the embryo's inner pressure.

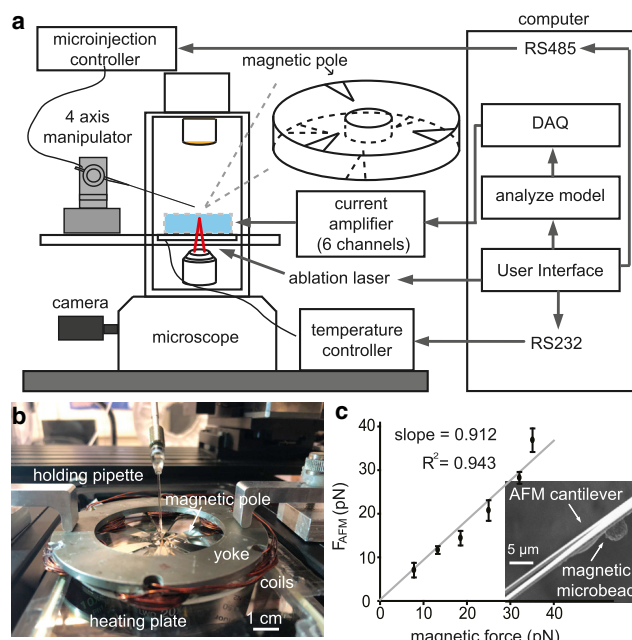

FIGURE 2 (a) A multipole magnetic tweezer with six magnetic poles (three in *top* layer and three in *bottom* layer, with the workspace chamber in the *center*), a micromanipulator, and a biopsy laser were integrated into a standard inverted microscope. (b) A picture of the multipole magnetic tweezer. (c) Magnetic force calibration using AFM, with scanning electron microscopy images showing a magnetic bead fixed onto the AFM cantilever. Error bar, SD;  $n = 5$  measurements. (d) Measurement of embryonic inner pressure and the trophoblast's Young's modulus using laser and magnetic micromanipulation: *i*) intact embryo held by a holding pipette; *ii*) mechanical measurement of the trophoblast with intact embryo inner pressure; *iii*) release of embryo inner pressure by laser ablation of trophoblast; and *iv*) mechanical measurement of the trophoblast after pressure release. The results of steps (*ii*) and (*iv*) were substituted into a contact mechanics model (Eq. 2) for decoupling cavity pressure and the Young's modulus of the trophoblast. To see this figure in color, go online.

## MATERIALS AND METHODS

### Design and fabrication of the multipole magnetic tweezers

The multipole magnetic tweezers consist of six magnetic poles with sharp tips (three poles placed in one plane and the other three poles placed in a different plane), a magnetic yoke, and coils. To achieve a large magnetic field gradient, the magnetic poles were made of high-permeability foils (silicon iron alloys; MuShield, Londonderry, NH), and the tips were fabricated by electric discharge machining (Sodick AD325L computer numerical control wire electrical discharge machining, tolerance  $\pm 5 \mu$ m). The magnetic yoke was fabricated through computer numerical control machining with a tolerance of  $\pm 0.1$  mm. Coils (magnetic wire, gauge 14; Digikey, Thief River Falls, MN) were wired onto the cores on the yoke. The magnetic poles were assembled onto an acrylic plate with alignment marks engraved by laser machining under a microscope to ensure the alignment of each pole pair within the same stage (either top stage or bottom stage). Detailed fabrication and assembly of the multipole magnetic tweezer device can be found in (17).

### Blastocyst embryos

Mouse embryos were purchased from Embryotech Laboratories (Haverhill, MA) (four-cell mouse embryos, B4-10). The embryos at four-cell stage were first thawed, then washed in M2 medium (EMD Millipore, Burlington, MA) three times, following the thawing instructions provided by the supplier. Then, the embryos were cultured for an additional 48 h to reach the blastocyst stage in KSOM medium (EMD Millipore) covered with mineral oil to prevent evaporation. The embryo stage was quantified by cell number counting after fixation and DAPI staining.

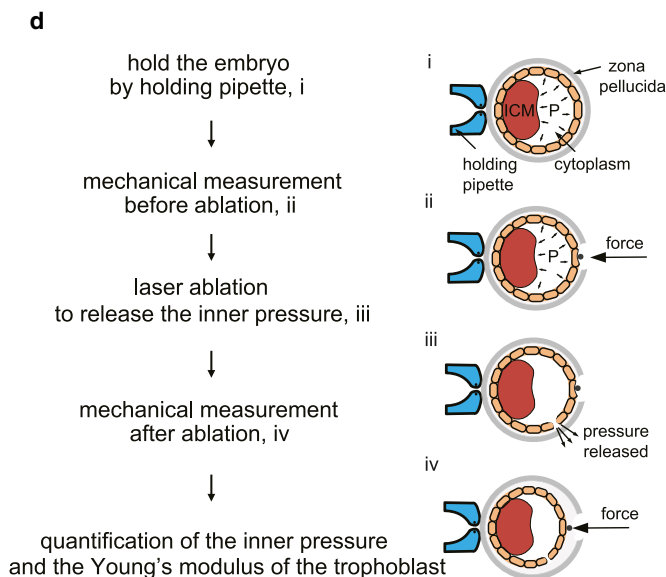

## Mechanical model

To decouple the inner pressure and the Young's modulus of the trophoblast of an embryo, a contact mechanics model based on the Hertz model was developed. Deformation of trophoblast caused by the magnetic bead was mostly recoverable, indicating largely elastic deformation. Because the radius of the blastocyst embryos was  $\sim 20$  times the radius of the magnetic bead (50 vs.  $2.5 \mu\text{m}$ ), the contact was assumed to be between a sphere and a half-space. The Hertz model requires the deformation caused by an applied force to be significantly smaller than the thickness of the material under measurement (18). As quantified in our experiments, the deformation caused by the magnetic force (in the range of  $0.4\text{--}1.2 \mu\text{m}$ ,  $0.58 \pm 0.10 \mu\text{m}$  for 12 embryos quantified) was significantly smaller than the thickness of the trophoblast (in the range of  $7.9\text{--}13.2 \mu\text{m}$ ,  $9.3 \pm 1.5 \mu\text{m}$  for 12 embryos quantified). With the embryo's inner pressure assumed to be homogeneously distributed underneath the trophoblast layer, the contact mechanics model is

$$F = P\pi R d + \frac{4}{3} \frac{E}{1 - \nu^2} R^{\frac{1}{2}} d^{\frac{3}{2}},$$

where  $P$  is the embryo's inner pressure,  $E$  is the Young's modulus of the trophoblast,  $\nu$  is the Poisson's ratio of the trophoblast,  $R$  is the radius of the magnetic bead,  $\pi R d$  is the contact area, and  $F$  and  $d$  are the force and bead indentation depths, respectively. In the mechanical model, the Poisson's ratio of trophoblast is set to be 0.5. As in many studies on mechanical characterization of cells (19–21), the cells of blastocyst embryos were assumed to be incompressible. Thus, in the mechanical model, the Poisson's ratio of the trophoblast was set to be 0.5. The incompressible assumption was also verified by the fact that the largest deformation caused by the magnetic bead with a force of 60 pN was very small (e.g., deformation versus cell thickness:  $0.58 \pm 0.10$  vs.  $9.3 \pm 1.5 \mu\text{m}$ ). Therefore, there was no significant volume change of the cells, i.e., cell volume was conserved during deformation. In experiments, measurements on the trophoblast of all embryos were made in areas without local irregular morphologies, such as local bulges.

## Drug treatment

Embryos were treated with cytochalasin D (CD) (4 or  $10 \mu\text{g/mL}$  in culture medium for 2 h, C8273; Sigma-Aldrich, St. Louis, MO) to specifically disrupt actin. CD powder was first dissolved in DMSO at a concentration of  $4 \text{ mg/mL}$  (or  $10 \text{ mg/mL}$ ), and then  $1 \mu\text{L}$  CD solution was added into  $1 \text{ mL}$  culture medium as working medium.  $1 \mu\text{L}$  DMSO was added to the control group to avoid the influence from DMSO. Each working medium was added to the embryos 2 h before experiment and washed off by the culture medium three times.

## Fluorescent staining

Embryonic day (E) 3.0–4.5 mouse embryos were fixed at 10 min in 4% paraformaldehyde in phosphate-buffered saline (PBS) followed by three washes in PBS. Embryos were permeabilized in 0.1% Triton X-100 in PBS for 20 min and washed three times by PBS. Embryos were then treated with phalloidin conjugate for 1 h (rhodamine phalloidin, dilution rate 1:1000). The nuclei were labeled by DAPI for 1 h (dilution rate 1:1000). Images were acquired using a Quorum Information Technologies (Calgary, Canada) spinning-disk confocal microscope, and image analysis was performed using Volocity software and Image J.

## Data processing

The embryo inner pressure/ICM mechanics experiments were conducted while images/videos were collected through a Nikon TE2000-S micro-

scope. Measurement of the embryo was completed within 30 min after it was taken out of the incubator. Trophoblast deformation was measured through tracking the bead position after force application, and the position changes were recorded over time. The centroid of the embryo was also tracked to compensating for drift of imaging during measurement. The collected force-deformation data from image processing have a displacement resolution of  $0.2 \mu\text{m}$  and a force resolution of 4 pN. Data analysis for quantifying apparent Young's modulus from force-deformation data and straightness of cell-cell contacts shown in Fig. S1 were conducted in MATLAB. The code is available at <https://github.com/XianShawn/intraembryo>.

## Statistical analysis

The error bars presented throughout the work all represent SD. Comparisons of each group were conducted by one-way analysis of variance and Student-Newman-Keuls test for pairwise comparisons in JMP. The statistical significance in each comparison was evaluated as  $p < 0.05$  for significance level.

## RESULTS AND DISCUSSION

The multipole magnetic tweezer device consists of six magnetic poles with sharp tips, a magnetic yoke, and coils. Distinct from traditional single-pole magnetic tweezers that can only apply pulling forces, this multipole magnetic tweezer device is capable of applying forces along three axes. To achieve a large magnetic field gradient, the magnetic poles were made of high-permeability foils (shielding alloys; MuShield) and the tips were fabricated by electrical discharge machining. The magnetic yoke strengthens the magnetic field by connecting all poles into a complete magnetic circuit. Coils were wired onto the cores on the yoke. Details of the magnetic tweezer device were previously described (17). The magnetic tweezer device was placed on a temperature-controlled heating plate (microplate heater; Cell MicroControls, Norfolk, VA). The coil current is controlled by a DAQ board with custom designed current amplifiers with feedback from current sensors.

The force exerted by the magnetic bead is quantified through the magnetic force model (17),

$$\mathbf{F}_{\text{mag}} = k_i \mathbf{I}^T \mathbf{N} \mathbf{I} + k_i I_{\text{max}}^2 \mathbf{K} \mathbf{P}. \quad (1)$$

and

$$\mathbf{K} = \begin{bmatrix} \frac{8}{l} & 0 & 0 \\ 0 & \frac{8}{l} & 0 \\ 0 & 0 & \frac{32}{l} \end{bmatrix}$$

and

$$\mathbf{P} = \begin{bmatrix} x \\ y \\ z \end{bmatrix},$$

where  $I$  is the current matrix consisting of the current in each coil;  $I_{max}$  is the maximal current in each coil (2 A in this work);  $N$  is the magnetic reluctance matrix, which depends on the pole and yoke materials and coil turns (40 turns in each coil);  $l$  equals 400  $\mu\text{m}$  and is the distance between the workspace center and the pole tip;  $P$  is the position of the bead; and  $k_i$  is a linear factor that was experimentally calibrated. The magnetic forces were calibrated by gluing a magnetic microbead on an AFM cantilever (see Fig. 2 c). Thermal spectroscopy (Nanoscope 8.10) was performed to accurately measure the spring constant of the AFM cantilever (spring constant 0.01 N/m, MSNL-10-C; Bruker, Billerica, MA) with the microbead fixed on its back. Applying currents to the coils exerted magnetic forces on the microbead and deformed the AFM cantilever.  $F_{AFM}$  was quantified through cantilever deformations and its spring constant. Fig. 2 c shows the calibration results. The root mean-square of the deviations between forces measured by the AFM cantilever and the model-calculated force reveal that resolution of the generated magnetic force is better than 3.75 pN.

A mouse embryo was first held by a holding micropipette mounted on the micromanipulator (step *i* in Fig. 2 d). The laser was controlled to precisely ablate a hole in the ZP, and a magnetic bead (diameter: 5.0  $\mu\text{m}$ , CFM-40-10, permeability: 0.35 H/m; Spherotech, Lake Forest, IL) was deposited directly onto the trophoblast cells (step *ii* in Fig. 2 d). The magnetic bead was then controlled to apply a 60 pN force to deform the trophoblast. The force-deformation data (blue curve in Fig. 3 a) reflect both the mechanical

properties (Young's modulus) of the trophoblast and the embryo's inner pressure. The laser was then controlled to ablate a hole in the trophoblast at a different position on the embryo to release the cavity pressure (step *iii* in Fig. 2 d). It was observed that the blastocyst cavity of the embryo gradually collapsed during pressure release (step *iv* in Fig. 2 d). After the size of the embryo and cavity reached the steady state, the magnetic bead was controlled by the magnetic tweezer to apply the same force (60 pN) to the trophoblast at the same location on the embryo. The force-displacement curve collected this time (red curve in Fig. 3 a) reflects only the mechanical property of the trophoblast. The force-displacement data collected with and without the embryo's inner pressure were then used to decouple the Young's modulus of the trophoblast and the embryo's inner pressure. A total of 12 mouse embryos were tested, and the embryos were fixed immediately after mechanical measurements and stained by DAPI for cell number counting.

To decouple the inner pressure and the Young's modulus of the trophoblast of an embryo, a contact mechanics model based on the Hertz model was developed. Deformation of the trophoblast caused by the magnetic bead was observed to be mostly recoverable, i.e., elastic deformation (Fig. 3 a). Because the area of the trophoblast layer is significantly larger than the area of contact by the magnetic bead on trophoblast, the embryo's inner pressure is assumed to be homogeneously distributed underneath the trophoblast layer. Hence,

$$F = P\pi R d + \frac{4}{3} \frac{E}{1 - \nu^2} R^{\frac{1}{2}} d^{\frac{3}{2}}, \quad (2)$$

where  $P$  is the embryo's inner pressure (gauge pressure, which is the absolute pressure minus atmospheric pressure or medium pressure);  $E$  is the Young's modulus of the trophoblast;  $\nu$  is the Poisson's ratio of the trophoblast and set to be 0.5, assuming the trophoblast is incompressible under small deformations;  $R$  is the radius of the magnetic bead;  $\pi R d$  is the contact area; and  $F$  and  $d$  are the force and bead indentation depths, respectively.

To validate the measured embryo inner pressure, AFM indentation was conducted, with different forces exerted onto the trophoblast and deformations recorded. As shown in Fig. 3 b, the AFM-measured force-deformation relationship showed good agreement (R-squared > 0.90) with the force-deformation relationship calculated using our experimentally measured embryo inner pressure and trophoblast's Young's modulus. The maximal deviation between the AFM-measured and the model-calculated trophoblast deformations was 0.02  $\mu\text{m}$ , which validates the measured embryo inner pressure. The model validation data (Fig. 3 c) also indicated that the Young's modulus of the trophoblast is independent of the embryo inner pressure, as assumed by the model in Eq. 2.

During morula through blastocyst progression, the ICM of the embryo undergoes shape changes (Fig. 1). To measure

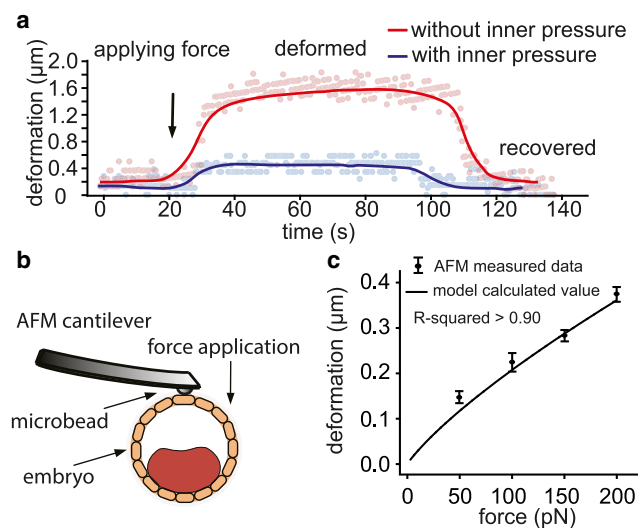

FIGURE 3 (a) Embryo deformation caused by magnetic-bead-applied force (60 pN) on trophoblast. (b) AFM characterization of blastocyst embryo after removing the ZP. (c) AFM-measured force-deformation data and the force-deformation relationship calculated using the experimentally measured embryo inner pressure and Young's modulus of the trophoblast of the same embryo. R-squared value is larger than 0.90.  $n = 5$  measurements for each data point; error bar: SD. To see this figure in color, go online.

the mechanical properties of the ICM, the magnetic microbead was introduced into the cavity of the embryo through microinjection. The injection micropipette stayed inside the embryo to maintain the embryo's inner pressure and thus the prestress on the ICM (Fig. 4 *d*). The magnetic bead was navigated three-dimensionally onto the center of the ICM to apply forces of 60 pN and deform the ICM for mechanical characterization (17).

The measured results from 12 embryos ranging from embryonic day E3.0 (~16 cells) to E4.5 (>100 cells) revealed significant increase of inner pressure with embryo stages (quantified through cell number counting). The data summarized in Fig. 4 *b* (linear regression coefficient  $R = 0.94$ ) also show a significant uphill slope, and the embryo's inner pressure at E4.5 is ~3.7 times that of E3.0. The increasing inner pressure can be attributed to the stronger osmotic process across the trophoblast (13). Trophoblast cells are known to be abundant with sodium and potassium pumps, which are responsible for increased ion concentrations inside the blastocyst cavity (22). The higher ion concentrations promote the osmotic process, which transports more water into the embryo, thus increasing the pressure inside the embryo (13). The increasing inner pressure enlarges the blastocyst cavity, which disrupts the radial symmetry of the embryo and establishes a symmetry along an axis called the embryonic/abembryonic axis, with the ICM at the embryonic pole

and the cavity at the abembryonic pole (23). The embryonic/abembryonic axis of the embryo further aligns with the longest diameter of the ZP, thus terminating free rotation of the embryo within the ZP (24).

Fig. 4 *c* shows that Young's modulus of the trophoblast increases during development, and linear regression shows a significant uphill slope ( $R = 0.83$ ,  $p = 0.008$ ). The Young's modulus of the trophoblast at embryonic day E4.5 is ~1.6 times that of E3.0. Fig. 4 *e* shows that the Young's modulus of the ICM increased 3.6 times from E3.0 to E4.5, based on the linear regression result from eight embryos, with a significant uphill slope ( $R = 0.95$ ,  $p = 0.0003$ ), indicating significant stiffening of the ICM. To study the reasons for the stiffening of the trophoblast and the ICM, the cortical actin was stained in different stages of embryos. Because the straightness of cell-cell contact from cortical actin staining can indicate tension (25–27), cortical actin was stained in different stages of embryos. Straightness was defined as the ratio of the length of the reference line (a straight line connecting the start and the end of one cell-cell contact) over the summation of the distance from each sampled dot on the cell-cell contact to the reference line, as shown in Fig. S1. The results showed that, with increase in cell number, the cell density increased, and cortical actin became more clearly defined at cell-cell junctions in the trophoblast layer (Fig. 5 *a*);

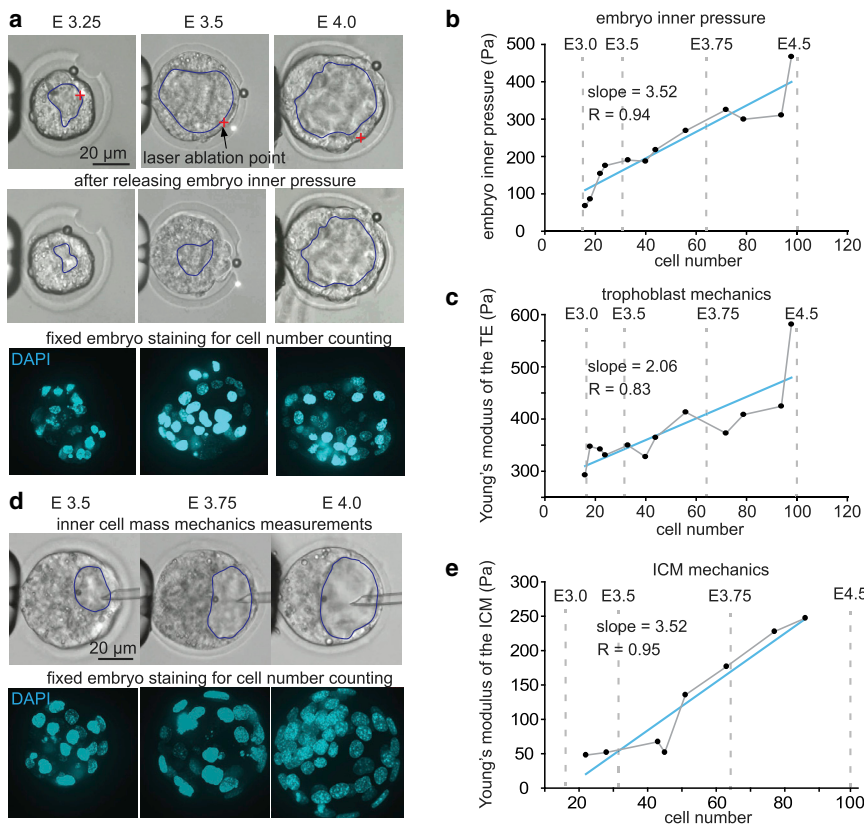

**FIGURE 4** (a) Measurement on trophoblast with and without embryo inner pressure in different stages of blastocyst embryos and fixation of embryo for cell counting. The blastocyst cavity was labeled manually (blue lines) based on the clear contour of the trophoderm. The red cross in the images indicates the laser ablation point on the trophoblast. Magnetic bead size:  $4.8 \pm 0.2 \mu\text{m}$ . (b) Embryo inner pressure of different embryo stages;  $n = 12$ ,  $t$ -test trend analysis  $p < 0.0001$ , linear regression coefficient  $R = 0.94$ . (c) The Young's modulus of the trophoblast of different embryo stages;  $n = 12$ ,  $t$ -test trend analysis  $p = 0.008$ , linear regression coefficient  $R = 0.83$ . (d) Measurement on ICM in different stages of blastocyst embryos and fixation of embryo for cell counting. The blastocyst cavity was labeled manually (blue lines) based on the clear contour of the trophoderm. (e) The Young's modulus of the trophoblast of different embryo stages;  $n = 8$ ,  $t$ -test trend analysis  $p = 0.0003$ , linear regression coefficient  $R = 0.95$ . To see this figure in color, go online.

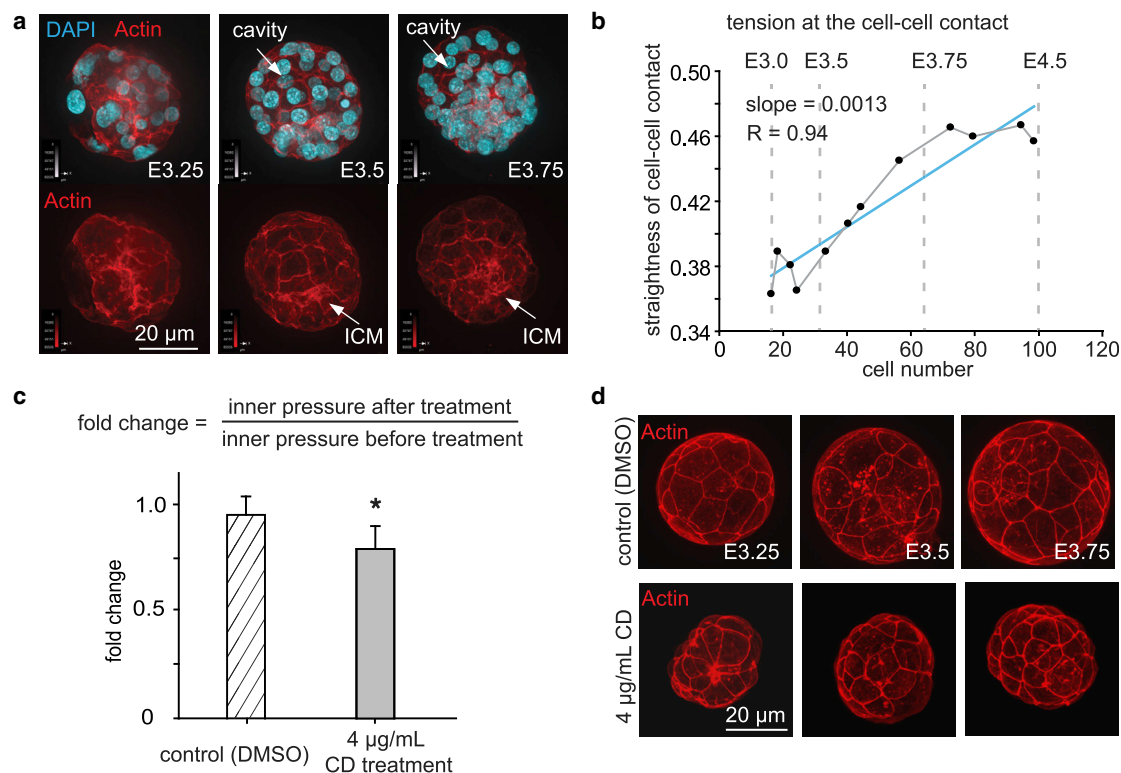

**FIGURE 5** (a) Nucleus and actin staining of different embryo stages shows intercellular cortical actin is more clearly defined over time. Nucleus: DAPI (blue), actin filaments: Alexa Fluor 594 phalloidin (red). (b) Straightness of the cell-cell contacts of trophoblast of different embryo stages;  $n = 12$ ,  $t$ -test trend analysis  $p = 0.0001$ , linear regression coefficient  $R = 0.94$ . The straightness value was calculated as the ratio of the length of the reference line (a straight line connecting the start and the end of one cell-cell contact) over the summation of the distance from each sampled dot on the cell-cell contact to the reference line. The value of straightness is close to 1 if the cell-cell contact line is close to a straight line. A higher value of straightness indicates a higher cortical tension in the cell-cell contact. The value straightness is close to 0 if the cell-cell contact is more curved, indicating smaller cortical tension in the cell-cell contact. The average straightness value of 20 lines in each embryo was used to represent the line straightness of the embryo. (c) Fold change of embryo inner pressure after treatment by DMSO (control group) and CD (CD) with a concentration of 4  $\mu$ g/mL.  $n = 5$  embryos, error bar: SD,  $p = 0.03$ . The fold change of embryo inner pressure is defined as the ratio of inner pressure measured after treatment over inner pressure measured before treatment. (d) Actin staining of the embryos treated by DMSO and CD. The CD-treated embryos were smaller in size compared with the control group of the same stage. The cell-cell contact was more straight in the control group, compared with the more curved shape in the CD-treated group. To see this figure in color, go online.

the straightness of cell-cell contact also increased ( $R = 0.94$ ,  $p < 0.0001$ ), indicating increased tension and tighter cell-cell junctions (Fig. 5 b). The increased inner pressure exerted on the surface of the trophoblast and ICM potentially induces mechanically sensitive pathways (11,12) (e.g., the Rho (28) and Hippo (29) pathways), which lead to the upregulation of actin filaments and remodeling of actin organization for higher cortical tension. The updated regulated actin expression (30), together with the higher tension between the cell-cell contact (31), potentially stiffens the trophoblast and ICM.

The stiffened trophoblast and ICM with more cell-cell junctions keep fluid from exiting through the epithelial layer, providing a tighter seal that may increase inner pressure. When the sealing was impacted through disrupting actin via CD treatment (Fig. 5, c and d; Fig. S3), the embryo inner pressure became significantly lower. As shown in Figs. 5, c and d and S3, moderate CD treatment (4  $\mu$ g/mL) resulted in marginally significant change of

actin intensity (Fig. S3 b), and marginally significantly decreased embryo inner pressure (Fig. 5 c). High-concentration CD treatment (10  $\mu$ g/mL) resulted in larger intensity changes of actin; however, it also resulted in the collapse of the blastocyst cavity (Fig. S3 a). The result indicated the necessity of actin (and cortical tension) for maintaining the embryo's inner pressure. However, whether actin is the primary structure that determines the embryo inner pressure and how tubulin (32), integrin subunits (33), cadherin, and other adhesion molecules (23) contribute to the embryo inner pressure require further investigations.

The growth of actin networks, driven by the tension on cell surfaces exerted by the embryo's inner pressure (34), plays a crucial role during development (35). It has been shown that disrupting the actin organization by cytochalasin B resulted in impaired development of embryos. In addition, rescuing actin with melatonin reversed the disrupted expression patterns of genes related to actin

organization (Arhgef2, Bc2, Coro2b, Flnc, and Palld) and rescued cytochalasin-B-induced impaired embryonic development (36). Considering the mechanosensitive nature of actin and the potential role of the inner pressure as a mechanical stimulus, disrupted embryo inner pressure could potentially result in impaired embryo development.

## CONCLUSIONS

In summary, we have, for the first time to our knowledge, experimentally characterized the inner pressure, Young's modulus of the trophoblast, and ICM of preimplantation mouse embryos. The results quantitatively showed that the inner pressure and the Young's modulus of trophoblast and ICM all increase during blastocyst stages and provide data for understanding how mechanical factors are physiologically integrated with other cues to direct embryo development.

## SUPPORTING MATERIAL

Supporting Materials and Methods and three figures are available at [http://www.biophysj.org/biophysj/supplemental/S0006-3495\(18\)31229-3](http://www.biophysj.org/biophysj/supplemental/S0006-3495(18)31229-3).

## AUTHOR CONTRIBUTIONS

X.W., S.H., and Y.S. designed the experiments and wrote the manuscript. X.W., Z.Z., and H.T. performed experimental work. X.W., J.L., S.H., and Y.S. performed theoretical and image analyses.

## ACKNOWLEDGMENTS

The authors thank financial support from the Natural Sciences and Engineering Research Council of Canada, the Canada Research Chairs Program, and the Ontario Research Fund-Research Excellence Program.

## REFERENCES

- Levin, M. 2012. Morphogenetic fields in embryogenesis, regeneration, and cancer: non-local control of complex patterning. *Biosystems*. 109:243–261.
- Keller, R. 2012. Developmental biology. Physical biology returns to morphogenesis. *Science*. 338:201–203.
- Lau, K., H. Tao, ..., S. Hopyan. 2015. Anisotropic stress orients remodelling of mammalian limb bud ectoderm. *Nat. Cell Biol.* 17:569–579.
- Maitre, J. L., H. Turlier, ..., T. Hiiragi. 2016. Asymmetric division of contractile domains couples cell positioning and fate specification. *Nature*. 536:344–348.
- Bissiere, S., M. Gasnier, ..., N. Plachta. 2018. Cell fate decisions during preimplantation mammalian development. *Curr. Top. Dev. Biol.* 128:37–58, Published online November 27, 2017.
- Samarage, C. R., M. D. White, ..., N. Plachta. 2015. Cortical tension allocates the first inner cells of the mammalian embryo. *Dev. Cell*. 34:435–447.
- Maitre, J. L., R. Niwayama, ..., T. Hiiragi. 2015. Pulsatile cell-autonomous contractility drives compaction in the mouse embryo. *Nat. Cell Biol.* 17:849–855.
- Korotkevich, E., R. Niwayama, ..., T. Hiiragi. 2017. The apical domain is required and sufficient for the first lineage segregation in the mouse embryo. *Dev. Cell*. 40:235–247.e7.
- Posfai, E., S. Petropoulos, ..., J. Rossant. 2017. Position- and Hippo signaling-dependent plasticity during lineage segregation in the early mouse embryo. *eLife*. 6:e22906.
- Saiz, N., K. M. Williams, ..., A. K. Hadjantonakis. 2016. Asynchronous fate decisions by single cells collectively ensure consistent lineage composition in the mouse blastocyst. *Nat. Commun.* 7:13463.
- Miller, C. J., and L. A. Davidson. 2013. The interplay between cell signalling and mechanics in developmental processes. *Nat. Rev. Genet.* 14:733–744.
- Mammoto, T., and D. E. Ingber. 2010. Mechanical control of tissue and organ development. *Development*. 137:1407–1420.
- Horner, V. L., and M. F. Wolfner. 2008. Mechanical stimulation by osmotic and hydrostatic pressure activates *Drosophila* oocytes in vitro in a calcium-dependent manner. *Dev. Biol.* 316:100–109.
- Johnson, W., C. Dai, ..., Y. Sun. 2018. A flexure-guided piezo drill for penetrating the zona pellucida of mammalian oocytes. *IEEE Trans. Biomed. Eng.* 65:678–686.
- Wang, X., H. Liu, M. Zhu, C. Cao, Z. Xu, Y. Tsatskis, K. Lau, C. Kuok, T. Filleter, H. McNeill, ..., Y. Sun. 2018. Mechanical stability of the cell nucleus: roles played by the cytoskeleton in nuclear deformation and strain recovery. *J. Cell Sci.* 131:jcs209627.
- Shojaei-Baghini, E., Y. Zheng, and Y. Sun. 2013. Automated micropipette aspiration of single cells. *Ann. Biomed. Eng.* 41:1208–1216.
- Wang, X., M. Luo, ..., Y. Sun. 2018. A three-dimensional magnetic tweezer system for intraembryonic navigation and measurement. *IEEE Trans. Robot.* 34:240–247.
- Kim, I. J. 2017. Surface measurement and analysis. *Pedestrian Fall Safety Assessments*. Springer, pp. 149–198.
- Nijenhuis, N., X. Zhao, ..., B. Derby. 2014. Combining AFM and acoustic probes to reveal changes in the elastic stiffness tensor of living cells. *Biophys. J.* 107:1502–1512.
- Kilpatrick, J. I., I. Revenko, and B. J. Rodriguez. 2015. Nanomechanics of cells and biomaterials studied by atomic force microscopy. *Adv. Healthc. Mater.* 4:2456–2474.
- Li, M., L. Liu, ..., Y. Wang. 2018. Atomic force microscopy studies on cellular elastic and viscoelastic properties. *Sci. China Life Sci.* 61:57–67.
- Jedrusik, A. 2015. Making the first decision: lessons from the mouse. *Reprod. Med. Biol.* 14:135–150.
- Maitre, J. L. 2017. Mechanics of blastocyst morphogenesis. *Biol. Cell*. 109:323–338.
- Fujimori, T. 2010. Preimplantation development of mouse: a view from cellular behavior. *Dev. Growth Differ.* 52:253–262.
- Kim, J. H., L. J. Dooling, and A. R. Asthagiri. 2010. Inter cellular mechanotransduction during multicellular morphodynamics. *J. R. Soc. Interface*. 7 (Suppl 3):S341–S350.
- Winklbauer, R. 2015. Cell adhesion strength from cortical tension - an integration of concepts. *J. Cell Sci.* 128:3687–3693.
- Urbano, J. M., H. W. Naylor, ..., B. Sanson. 2018. Suppression of epithelial folding at actomyosin-enriched compartment boundaries downstream of Wntless signalling in *Drosophila*. *Development*. 145:dev155325.
- Amano, M., M. Nakayama, and K. Kaibuchi. 2010. Rho-kinase/ROCK: a key regulator of the cytoskeleton and cell polarity. *Cytoskeleton (Hoboken)*. 67:545–554.
- Meng, Z., T. Moroishi, and K. L. Guan. 2016. Mechanisms of Hippo pathway regulation. *Genes Dev.* 30:1–17.
- Kono, K., D. A. Tamashiro, and V. B. Alarcon. 2014. Inhibition of RHO-ROCK signaling enhances ICM and suppresses TE characteristics through activation of Hippo signaling in the mouse blastocyst. *Dev. Biol.* 394:142–155.

31. Shawky, J. H., and L. A. Davidson. 2015. Tissue mechanics and adhesion during embryo development. *Dev. Biol.* 401:152–164.
32. White, M. D., J. Zenker, ..., N. Plachta. 2018. Instructions for assembling the early mammalian embryo. *Dev. Cell.* 45:667–679.
33. Campbell, S., H. R. Swann, ..., J. D. Aplin. 1995. Cell adhesion molecules on the oocyte and preimplantation human embryo. *Hum. Reprod.* 10:1571–1578.
34. Dupont, S., L. Morsut, ..., S. Piccolo. 2011. Role of YAP/TAZ in mechanotransduction. *Nature.* 474:179–183.
35. Hildebrand, S., S. Hultin, ..., L. Holmgren. 2017. The E-cadherin/AmotL2 complex organizes actin filaments required for epithelial hexagonal packing and blastocyst hatching. *Sci. Rep.* 7:9540.
36. Tan, K., L. An, ..., J. H. Tian. 2015. Actin disorganization plays a vital role in impaired embryonic development of in vitro-produced mouse preimplantation embryos. *PLoS One.* 10:e0130382.

**Biophysical Journal, Volume 115**

**Supplemental Information**

**Characterizing Inner Pressure and Stiffness of Trophoblast and Inner  
Cell Mass of Blastocysts**

**Xian Wang, Zhuoran Zhang, Hirotaka Tao, Jun Liu, Sevan Hopyan, and Yu Sun**

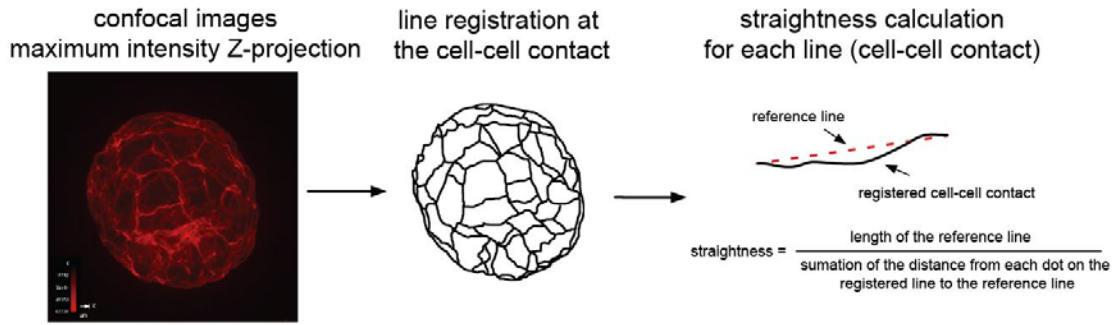

Figure S1 Line scanning for quantifying the straightness of cell-cell contact in blastocyst embryos. The confocal Z-stack images of embryos with actin labeled were first projected to X-Y plane using the maximum intensity. The image was then binarized and the cell-cell contact was registered using Canny edge detection. The detected line was proofread manually after line detection. The straightness value was calculated as the ratio of the length of the reference line (a straight line connecting the start and the end of one cell-cell contact) over the summation of the distance from each sampled dot on the cell-cell contact to the reference line. The value of straightness is close to 1 if the cell-cell contact line is close to a straight line. A higher value of straightness indicates a higher cortical tension in the cell-cell contact. The value straightness is close to 0 if the cell-cell contact is more curved, indicating smaller cortical tension in the cell-cell contact. The average straightness value of 20 lines in each embryo was used to represent the straightness of the embryo.

## Comparison between multi-pole magnetic tweezers and Atomic Force Microscopy

AFM can be used for measuring force-displacement data on the blastocyst surface. However, due to the barrier of the Zona Pellucida (ZP), the AFM probe cannot directly contact the trophoblast. As shown in Fig. S2(a), direct indentation onto the ZP using different indentation depths could give the Young's modulus of the ZP and trophoblast, if the first layer (ZP) is softer or similar in Young's modulus compared with the second layer (trophoblast). However, ZP is significantly stiffer than the trophoblast (~15 kPa vs. 0.3 kPa); the thickness of ZP and the gap between ZP and trophoblast varies across different stages of blastocyst, making the task of decoupling mechanical properties of the two layers (ZP and trophoblast) infeasible.

In our work, laser ablation was used to create a small access area for the microbead to directly contact the trophoblast for measurement, while creating a hole on ZP for AFM to directly access trophoblast requires the laser to pass through the embryo [Fig. S2(b)], which may undesirably create a hole on trophoblast and release the embryo inner pressure.

For the first task in our paper, i.e., decoupling embryo inner pressure and Young's modulus of trophoblast, removing all ZP was needed to enable AFM to directly contact the trophoblast for mechanical measurement. The ZP can be removed either chemically or mechanically. It is unknown whether the chemical (e.g., acidified Tyrode's solution) used for dissolving ZP would change the embryo inner pressure or mechanical properties of the trophoblast. Therefore, for the validation experiment with AFM [see Fig. 3 in the paper], we mechanically removed the ZP by conducting careful laser ablation around one focal plane of ZP, then with extreme care pulling out the embryo body using a pipette connected to the robotic micromanipulator.

This process was highly time-consuming and skill dependent. After mechanical isolation of ZP, the embryo was moved to the AFM for measuring force-displacement data [Fig. S2(c)] to validate the results from using our magnetic tweezers.

For the second task in our paper, the ICM mechanics was measured by the magnetically controlled microbead inside blastocyst of different stages. In this case, it is not realistic to use AFM for performing mechanical measurement on the ICM which is inside the embryo.

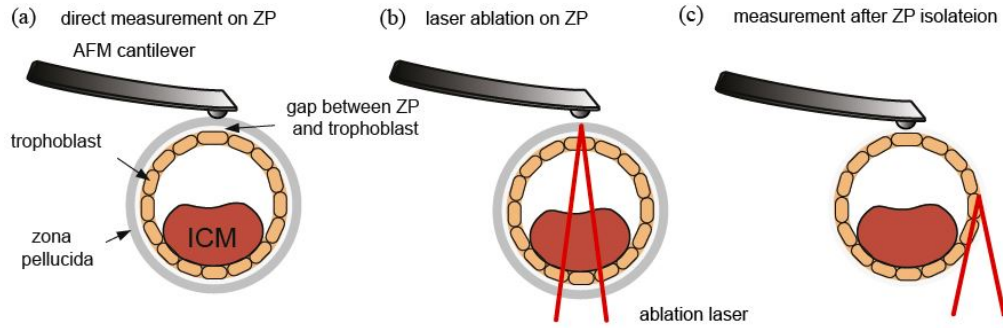

Figure S2 (a) Direct AFM measurement on zona pellucida (ZP) for decoupling the Young's modulus of both ZP and trophoblast. (b) Laser ablation on ZP to create a direct contact area between the AFM probe and the trophoblast. However, the ablation laser has to pass through the embryo, potentially disturb the embryo inner pressure. (c) AFM measurement on embryo after removing ZP. The measurement was first conducted with embryo inner pressure, then laser ablation create a hole on the trophoblast to release the inner pressure. The measurement was then conducted without the embryo inner pressure. The embryo inner pressure and Young's modulus of trophoblast can be decoupled using the force-displacement with and without inner pressure with the model Eq. (2).

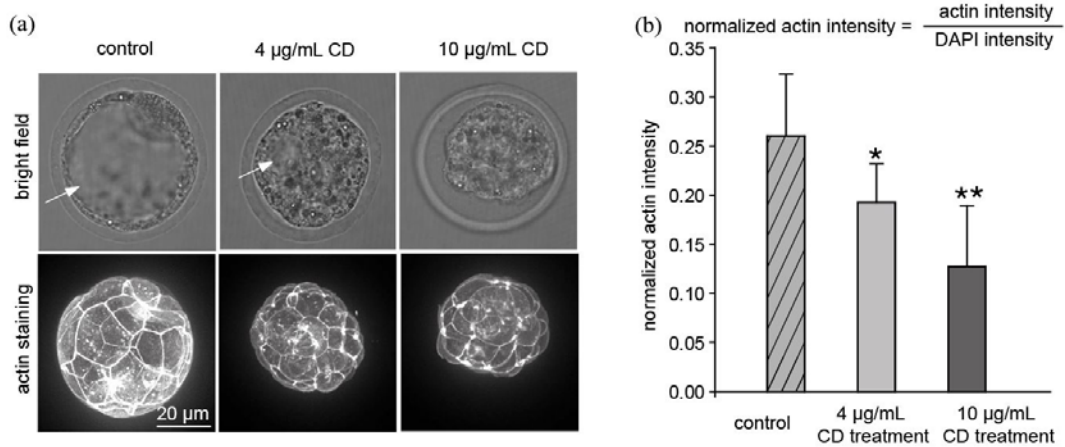

Figure S3 (a) Bright field images and actin staining after cytochalasin D treatment using concentration of 4 µg/mL and 10 µg/mL. The control group was treated with DMSO. White arrows indicate blastocyst cavity. (b) Normalized actin intensity comparison between the control group (DMSO), CD treatment of 4 µg/mL, and CD treatment of 10 µg/mL. The normalized actin intensity was calculated by the division of actin intensity and DAPI intensity. N = 6 embryos, error bar: standard deviation. \*P is marginally significant, and equals to 0.056. \*\*P = 0.004, significantly different from the control group.
